# Supplementary material for: Droplet Digital PCR Development To Quantify the DNA Meth-Ylation Levels of SEPT9 and SHOX2 in Plasma From Patients With Head and Neck Squamous Cell Carcinoma
Source: Preprints.org preprint supplement (doi:10.20944/preprints202305.0397.v1), 2023-05-06
Supplement: Supplementary file 1 [file supplementary]

| **DNA methylation Specific Assay for *SEPT9*** | **Primers/**  **probe** | **Sequence (5’ – 3’)** | **Amplicon length** |
| --- | --- | --- | --- |
| **SEPT9-M** | Forward  Reverse  Probe | TTTTAGGACGTATAGTTTTATTTTGGGAAA  CGCGACTATCCACTCAATCGAAAA  FAM-CGACCTCCCTATCCCGTTACCGAATCCAA | 139 bp |
| **SEPT9-U** | Forward  Reverse  Probe | TTTTAGGATGTATAGTTTTATTTTGGGAAA  AAACACAACTATCCACTCAATCAAA  HEX-ACAACCTCCCTATCCCATTACCAAATCCAA | 142 bp |
| **DNA methylation Specific Assay for *SHOX2*** | **Primers**  **/probe** | **Sequence (5’ – 3’)** | **Amplicon length** |
| **SHOX2-M** | Forward  Reverse  Probe | AAGGGTTCGTCGTTTAAGTC  AATCGAATCTACGTTTCCAC  FAM-TTTCGGTGGCGGGCGAAAGT | 124 bp |
| **ACTB** | Forward  Reverse  Probe | AGGAGGTTTAGTAAGTTTTTTGGAT  CAATAAAACCTACTCCTCCCTTAAAAA  HEX-ACCACCACCCAACACACAATAACAAACA | 129 bp |

**Supplementary Table 1.** Sequence of primers and probes used for MS-ddPCRs assays to detect the DNA methylation levels of *SEPT9* and *SHOX2*.
